# Supplementary material for: DNA Methylation of PI3K/AKT Pathway-Related Genes Predicts Outcome in Patients with Pancreatic Cancer: A Comprehensive Bioinformatics-Based Study
Source: MDPI journal article supplement (doi:10.3390/cancers13246354), 2021-12-17
Supplement: s1 [file s1]

## Supplementary Materials

**Supplementary Table S1 – PI3K/AKT differentially expressed genes in the GSE28735 dataset.** The expression of 15 genes from the PI3K/AKT pathway was compared between tumor and normal samples from the GSE28735 dataset. Raw data was downloaded from GEO (<https://www.ncbi.nlm.nih.gov/geo/>) and normalized through the Robust Multichip Averaging (RMA) method using BRB array tools. Paired t-test was performed between paired tumor-normal samples (n=45\*2) for differential expression analysis.

| Pathway  | Gene symbol     | Probe   | Fold-change | <i>p</i> value* | Expression higher |
|----------|-----------------|---------|-------------|-----------------|-------------------|
| PI3K/Akt | <i>ITGA4</i>    | 8046695 | 1.03        | 0.41            | Tumour            |
|          | <i>SFN</i>      | 7899265 | 1.26        | <0.0001         | Tumour            |
|          | <i>PPP2R5C</i>  | 7976863 | 1.00        | 0.68            | Tumour            |
|          | <i>PIK3CD</i>   | 7897482 | 0.99        | 0.34            | Normal Tissue     |
|          | <i>ITGA2</i>    | 8105267 | 1.36        | <0.0001         | Tumour            |
|          | <i>PIK3R1</i>   | 8105778 | 0.99        | 0.68            | Normal Tissue     |
|          | <i>AKT3</i>     | 7925531 | 1.01        | 0.78            | Tumour            |
|          | <i>EIF4EBP1</i> | 8145889 | 0.92        | 0.01            | Normal Tissue     |
|          | <i>INPP5D</i>   | 8049246 | 1.04        | 0.22            | Tumour            |
|          | <i>JAK2</i>     | 8154178 | 1.04        | 0.18            | Tumour            |
|          | <i>MRAS</i>     | 8082965 | 1.01        | 0.58            | Tumour            |
|          | <i>MAP2K2</i>   | 8032761 | 1.00        | 0.88            | Normal Tissue     |
|          | <i>MAP3K8</i>   | 7926900 | 1.03        | 0.41            | Tumour            |
|          | <i>RAC2</i>     | 8075910 | 1.06        | 0.01            | Tumour            |
|          | <i>PTEN</i>     | 7928959 | 0.99        | 0.07            | Normal Tissue     |

\* Benjamini hochberg corrected *p* value

**Supplementary Table S2 – Differential methylated genes in the GSE49149 and GSE67205 cohorts.** Beta Sheet File from both datasets were downloaded from GEO (<https://www.ncbi.nlm.nih.gov/geo/>) and beta values ( $\beta$ , methylation score) of the CpGs in study were compared between normal (n=19) and pancreatic tumor (n=155) samples for the GSE49149 cohort and between tumour (n = 11) and pancreatic tissue (n = 5) samples for the GSE67205 cohort. AUC, Area Under the ROC Curve.

| Pathway  | Cohort   | Gene symbol | Probe      | Mean $\beta$ pancreatic tissue | Mean $\beta$ tumour tissue | $ \Delta\beta $ | AUC               | Methylation higher | <i>p</i> value* |       |
|----------|----------|-------------|------------|--------------------------------|----------------------------|-----------------|-------------------|--------------------|-----------------|-------|
| PI3K/Akt | GSE49149 | ITGA4       | cg25652029 | 0.115                          | 0.356                      | 0.242           | 0.908             | Tumour             | <0.0001*        |       |
|          |          |             | cg06952671 | 0.035                          | 0.387                      | 0.352           | 0.939             |                    |                 |       |
|          |          |             | cg21995919 | 0.052                          | 0.388                      | 0.336           | 0.939             |                    |                 |       |
|          |          |             | cg25024074 | 0.071                          | 0.427                      | 0.356           | 0.959             |                    |                 |       |
|          |          | SFN         | cg17330303 | 0.800                          | 0.561                      | 0.239           | 0.894             | Normal Tissue      | <0.0001*        |       |
|          |          |             | cg13466284 | 0.720                          | 0.530                      | 0.190           | 0.872             |                    |                 |       |
|          |          |             | cg07786675 | 0.780                          | 0.511                      | 0.269           | 0.891             |                    |                 |       |
|          |          |             | cg13374701 | 0.855                          | 0.621                      | 0.233           | 0.883             |                    |                 |       |
|          |          |             | cg12583970 | 0.809                          | 0.633                      | 0.175           | 0.866             |                    |                 |       |
|          |          |             | PIK3CD     | cg07805542                     | 0.609                      | 0.260           | 0.349             |                    |                 | 0.937 |
|          |          |             | ITGA2      | cg08446038                     | 0.541                      | 0.269           | 0.272             |                    |                 | 0.946 |
|          |          |             | PIK3R1     | cg15021292                     | 0.711                      | 0.506           | 0.205             |                    |                 | 0.860 |
|          | GSE67205 | ITGA4       | cg06952671 | 0.083                          | 0.309                      | 0.226           | Tumour            | 0.00063            |                 |       |
|          |          |             | cg21995919 | 0.017                          | 0.187                      | 0.170           |                   | 0.0053             |                 |       |
|          |          |             | cg25024074 | 0.037                          | 0.149                      | 0.112           |                   | 0.013              |                 |       |
|          |          | SFN         | cg07786675 | 0.896                          | 0.571                      | 0.325           | Pancreatic Tissue | 0.0054             |                 |       |
|          |          |             | cg13374701 | 0.890                          | 0.576                      | 0.314           |                   | 0.003              |                 |       |
|          |          | PIK3CD      | cg07805542 | 0.539                          | 0.155                      | 0.384           | Pancreatic Tissue | 0.027              |                 |       |

\* Bonferoni corrected *p* value

**Supplementary Table S3 –Cox regression analyses of the clinicopathological parameters and Overall Survival (OS).** Data was downloaded from the TCGA cohort of pancreatic cancer at <http://xena.ucsc.edu/> and patients who received neoadjuvant therapy were excluded (n=183). \*Cox proportional hazards regression performed with OS. \*\*Treated as a continuous variable 1: Stage 1, Stage 1A, Stage 1B; 2: Stage 2A, Stage 2B; 3: Stage 3, 4: Stage 4. \*\*\*Treated as a continuous variable 1: Well differentiated; 2: Moderately differentiated; 3: Poorly differentiated or undifferentiated. *Nr.*, number; *HR*, Hazard ratio.

| Patient Characteristics     | Nr. | HR*   | <i>p</i> value* |
|-----------------------------|-----|-------|-----------------|
| <b>Age</b>                  |     |       |                 |
| Age ≤ 60 (ref.)             | 57  | 1.37  | 0.159           |
| Age > 60                    | 126 |       |                 |
| <b>Pathological Stage**</b> |     |       |                 |
| Stage 1                     | 1   | 1.37  | 0.081           |
| Stage 1A                    | 5   |       |                 |
| Stage 1B                    | 15  |       |                 |
| Stage 2A                    | 30  |       |                 |
| Stage 2B                    | 120 |       |                 |
| Stage 3                     | 5   |       |                 |
| Stage 4                     | 5   |       |                 |
| Unknown                     | 2   |       |                 |
| <b>Gender</b>               |     |       |                 |
| Male (ref.)                 | 100 | 1.211 | 0.342           |
| Female                      | 83  |       |                 |
| <b>Grade***</b>             |     |       |                 |
| Well differentiated (ref.)  | 31  | 1.466 | <b>0.007</b>    |
| Moderately differentiated   | 96  |       |                 |
| Poorly differentiated or    | 53  |       |                 |
| Unknown                     | 3   |       |                 |
| <b>Race</b>                 |     |       |                 |
| White (ref.)                | 160 |       | 0.8             |
| Black or African American   | 7   | 1.157 | 0.752           |
| Asian                       | 11  | 0.769 | 0.569           |
| Unknown                     | 5   |       |                 |

**Supplementary Table S4 – Multivariate Cox regression analyses of the gene methylation and Overall Survival (OS).** Data was downloaded from the TCGA cohort of pancreatic cancer at <http://xena.ucsc.edu/> and patients who received neoadjuvant therapy were excluded (n=183). \*Multivariate cox proportional hazards regression (Backward Wald) performed with OS. *Nr.*, number; *HR*, Hazard ratio. Gene methylation cut-offs were used as described in the methods and main manuscript.

|                   |       | 95% CI for HR |       |          |
|-------------------|-------|---------------|-------|----------|
| TCGA (n=183)      | HR*   | Lower         | Upper | p value* |
| Step 1            |       |               |       |          |
| Grade             | 1.413 | 1.060         | 1.883 | 0.019    |
| ITGA2@cg08446038  | 0.763 | 0.496         | 1.173 | 0.218    |
| Step 2            |       |               |       |          |
| Grade             | 1.466 | 1.112         | 1.934 | 0.007    |
| Grade             | 1.384 | 1.037         | 1.846 | 0.027    |
| ITGA4@cg25024074  | 1.845 | 1.037         | 3.282 | 0.037    |
| Grade             | 1.391 | 1.046         | 1.849 | 0.023    |
| ITGA4@cg21995919  | 1.834 | 1.092         | 3.080 | 0.022    |
| Grade             | 1.384 | 1.030         | 1.860 | 0.031    |
| PIK3R1@cg15021292 | 0.481 | 0.266         | 0.867 | 0.015    |
| Grade             | 1.404 | 1.051         | 1.875 | 0.021    |
| SFN@cg17330303    | 0.543 | 0.314         | 0.941 | 0.029    |
| Grade             | 1.337 | 0.994         | 1.797 | 0.054    |
| SFN@cg13466284    | 0.445 | 0.245         | 0.807 | 0.008    |
| Step 1            |       |               |       |          |
| Grade             | 1.397 | 1.041         | 1.875 | 0.026    |
| SFN@cg07786675    | 0.653 | 0.371         | 1.148 | 0.139    |
| Step 2            |       |               |       |          |
| Grade             | 1.466 | 1.112         | 1.934 | 0.007    |
| Grade             | 1.319 | 0.977         | 1.781 | 0.071    |
| SFN@cg13374701    | 0.440 | 0.224         | 0.865 | 0.017    |
| Grade             | 1.350 | 1.001         | 1.821 | 0.049    |
| SFN@cg12583970    | 0.592 | 0.333         | 1.050 | 0.073    |

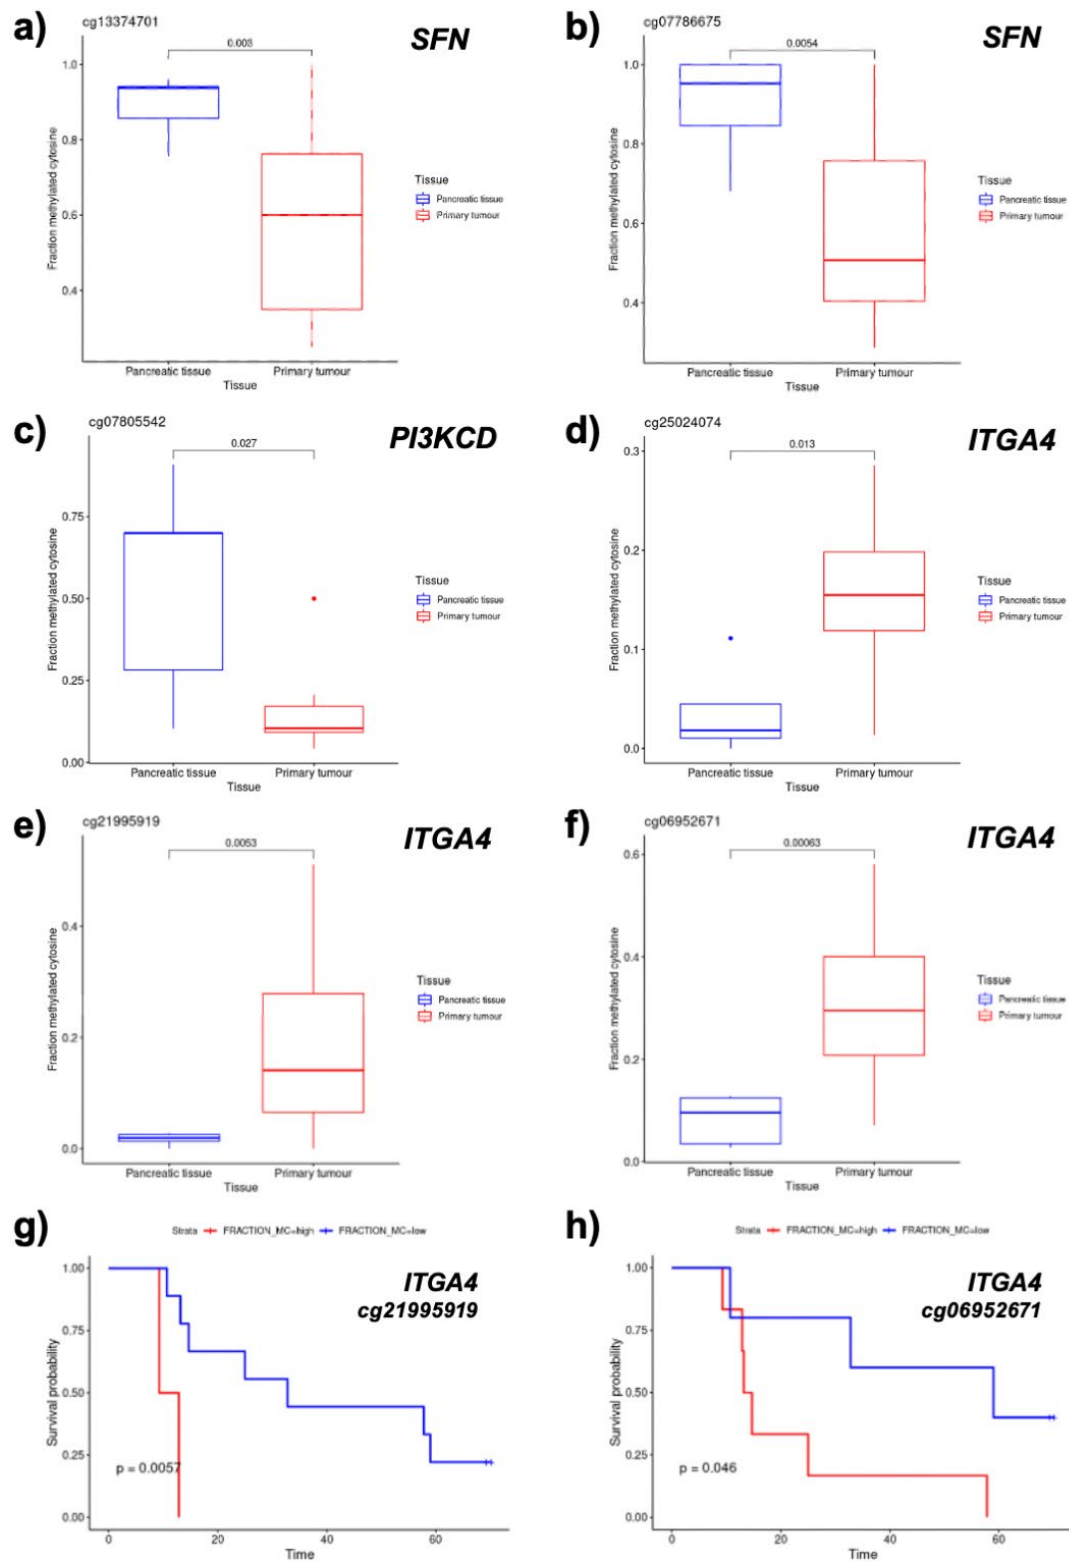

**Supplementary Figure S1 – Methylation status and Overall Survival analysis in pancreatic cancer in the GSE67205 cohort.** Comparison between pancreatic and tumour tissue of *SFN* (a, b), *PI3KCD* (c) and *ITGA4* (d, e, f). Kaplan-Meier curve for OS considering (g) *cg06952671* (cut-off= 0.2632; hazard ratio= 0.21) and (h) *cg21995919* methylation (cut-off= 0.2963; hazard ratio= 0.072). Patients with methylation levels inferior and superior to the cut-off were considered as low (represented in blue) and high (represented in red), respectively.

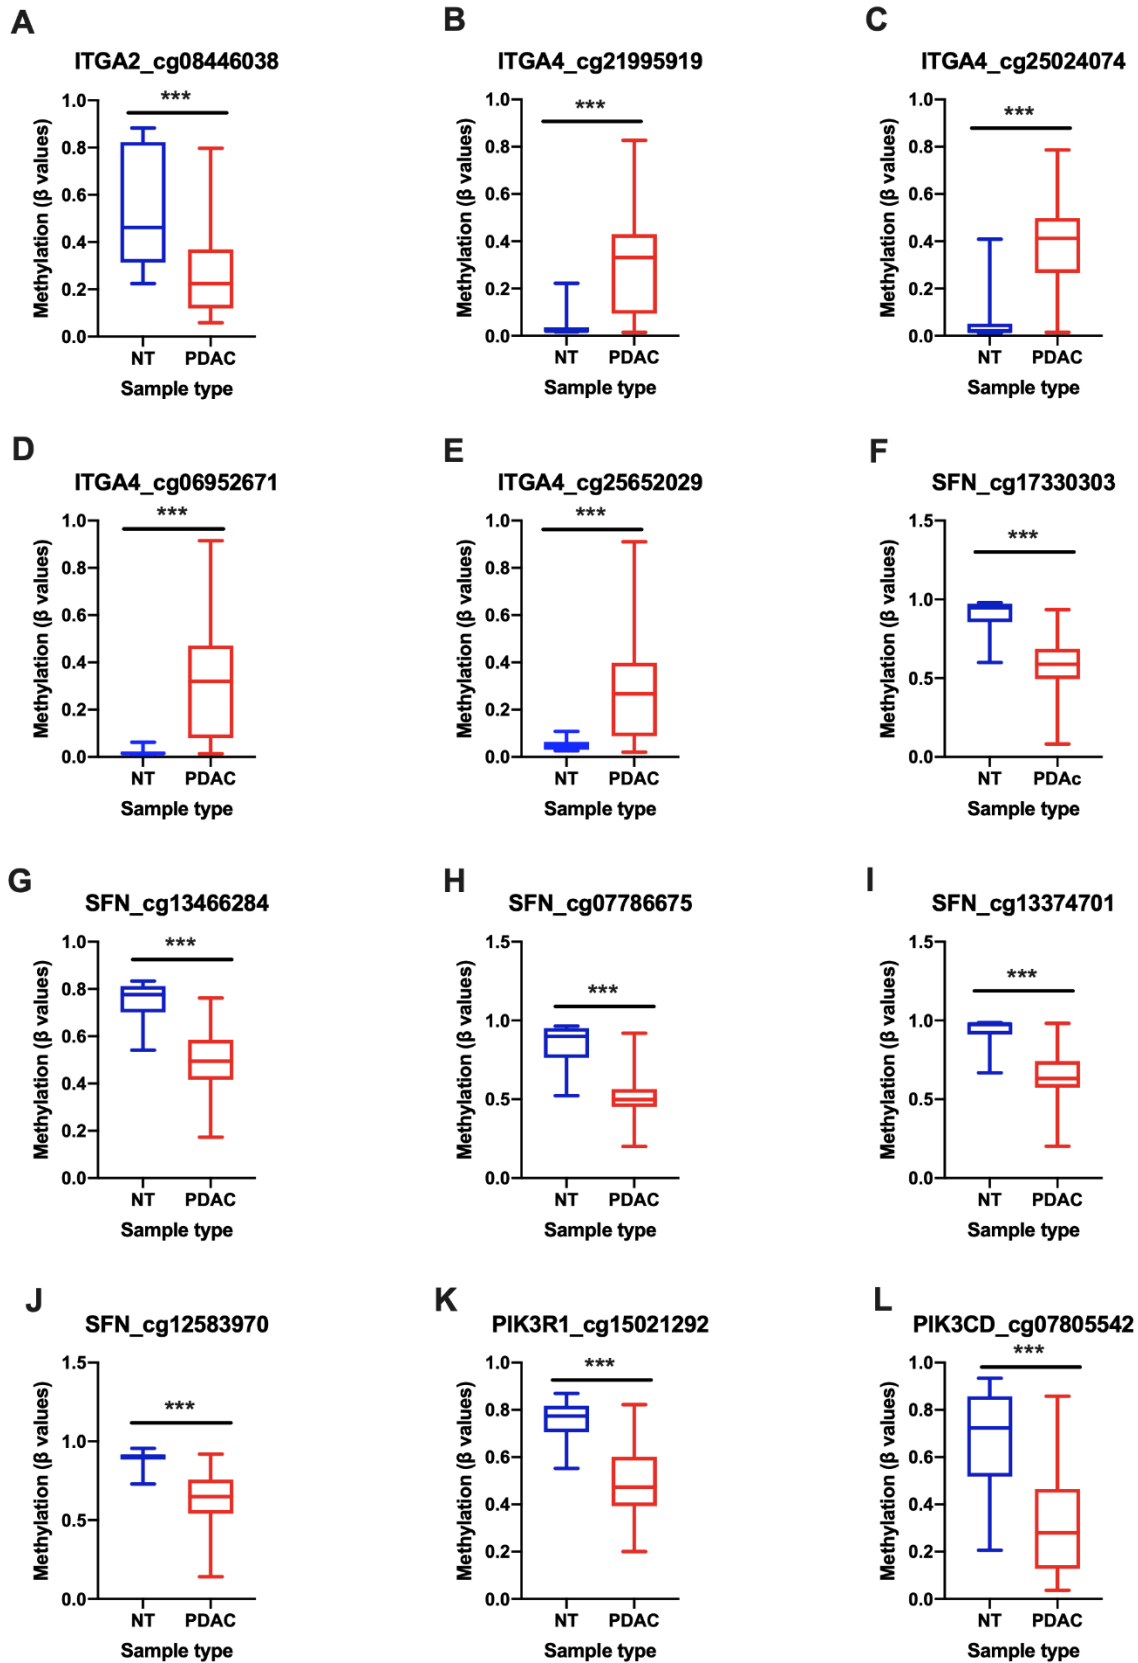

Supplementary Figure S2 – Methylation status of pancreatic ductal adenocarcinoma samples from the TCGA cohort. Beta values ( $\beta$ , methylation score) of the 12 CpGs in study were compared between normal ( $n = 9$ ) and PDAC tissue ( $n = 183$ ) using the Mann-Whitney test for differential expression analysis (\*\*\*)  $p < 0.001$ . NT, normal tissue; PDAC, pancreatic ductal adenocarcinoma.

(a)

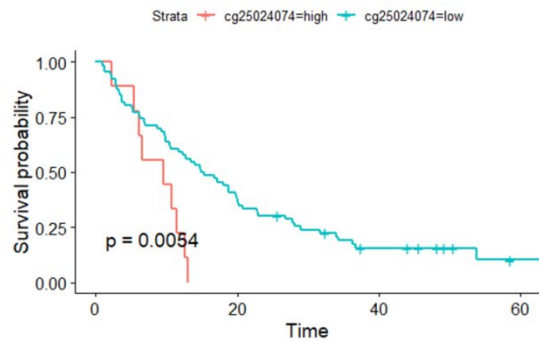

(b)

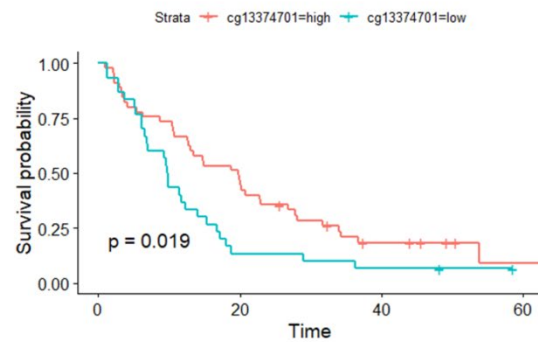

**Supplementary Figure S3 – *ITGA4* and *SFN* methylation can predict survival in pancreatic cancer in the PDX cohort.** Kaplan-Meier curve for OS considering (a) cg25024074 (cut-off=0.9711; hazard ratio=0.36) and (b) cg13374701 methylation (cut-off=0.3553; hazard ratio=1.18). Patients with methylation levels inferior and superior to the cut-off were considered as low (represented in blue) and high (represented in red), respectively.

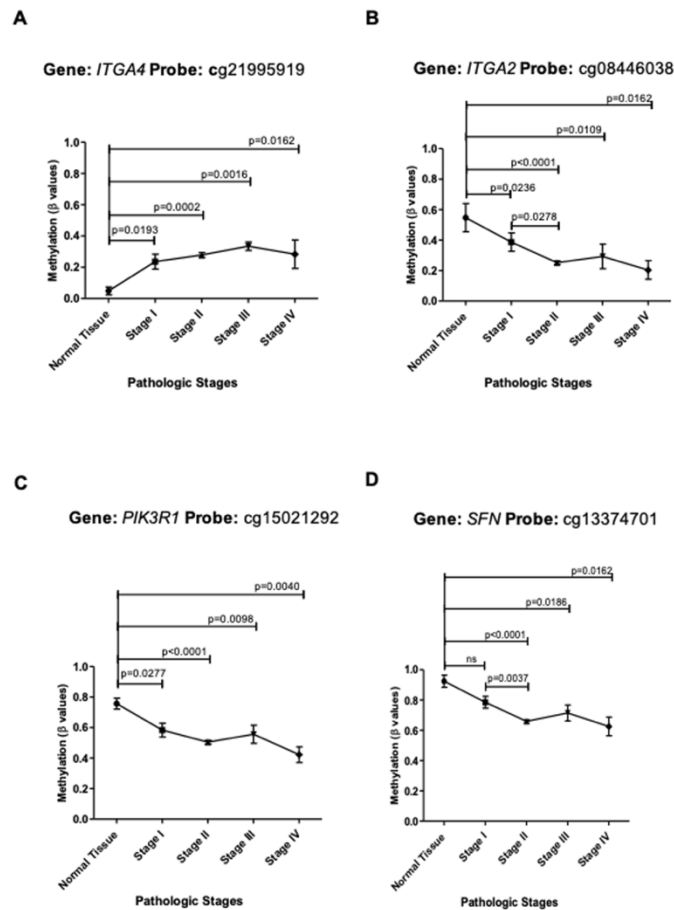

**Supplementary Figure S4 - Methylation of PI3K/AKT related genes discriminates between normal and malignant tissue of different pathological stages in the TCGA cohort.** Comparison between methylation levels of (a) *ITGA4*@cg21995919, (b) *ITGA2*@cg08446038, (c) *PIK3R1*@cg15021292 and (d) *SFN*@13374701 genes according to the tumour pathological stage (one-way ANOVA, followed by Kruskal-Wallis test and Dunn's Multiple Comparison Test). Number of samples per stage: I (n=21), II (n=150), III (n=5) and IV (n=5). Values are represented as mean ± SEM.

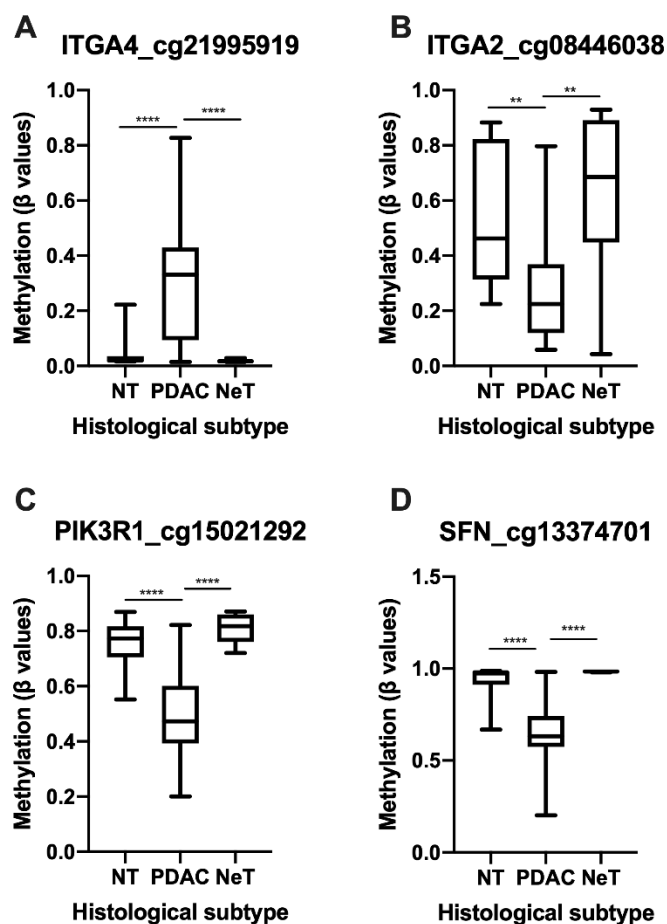

**Supplementary Figure S5 - Methylation of the PI3K/AKT related genes differs between distinct histological subtypes of pancreatic cancer in the TCGA cohort.** Comparison between DNA methylation of (a) *ITGA4*@cg21995919, (b) *ITGA2*@cg08446038, (c) *PIK3R1*@cg15021292 and (d) *SFN*@cg13374701 considering different histological subtypes of PCA. Statistical analysis of the data was performed using One-way ANOVA followed by Dunn's multiple comparison test (\*\* $p < 0.01$ ; \*\*\*\* $p < 0.0001$ ). NT, normal tissue; PDAC, pancreatic ductal adenocarcinoma; NeT, neuroendocrine tumour.
